# Supplementary material for: Global component analysis of errors in three satellite-only global precipitation estimates
Source: Copernicus journal article supplement (doi:10.5194/hess-25-3087-2021), 2021-06-09
Supplement: Supplementary file 1 [file hess-25-3087-2021-supplement.pdf]

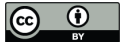

*Supplement of*

## **Global component analysis of errors in three satellite-only global precipitation estimates**

**Hanqing Chen et al.**

*Correspondence to:* Bin Yong (yongbin@hhu.edu.cn)

The copyright of individual parts of the supplement might differ from the article licence.

## **The approach to deal with the inconsistency of benchmark**

To alleviate the effects of reference inconsistency on the analysis, the SPP error metrics over mainland China and the rest of the world were calculated using the following steps:

### **(1) Global maps of biases and systematic error**

- a. The spatial maps of biases and systematic error computed over the global land areas use CPCU data as the benchmark. Maps of biases and systematic error over mainland China use CGDPA data as the reference.
- b. The spatial maps of biases and systematic error over mainland China replace the Chinese mainland part of the global land areas.

### **(2) Error components of SPPs under different precipitation intensities**

The satellite and ground reference precipitation values over the globe (except for mainland China) were stored in vector  $S1$  and vector  $G1$ , respectively. Then the satellite and ground reference precipitation values over mainland China were stored in vector  $S2$  and vector  $G2$ , respectively. Third,  $S1$  and  $S2$  form a new vector  $S$  ( $S = [S1, S2]^T$ ), while  $G1$  and  $G2$  form a new vector  $G$  ( $G = [G1, G2]^T$ ). Finally, the SPP error components under different precipitation intensities were computed by using equations (1)-(9).

The inconsistency of reference data has little impact on the evaluation results.

**Table S1** Summary of the total bias and its three independent components for five evaluated satellite-only global precipitation estimates in main areas of the global land areas.<sup>a</sup>

| Products   | Season | COUNS                                                                           | Mexico                                   | Brazil                                                                               | Europe                                          | India                                    | China                                             | Australia                                |
|------------|--------|---------------------------------------------------------------------------------|------------------------------------------|--------------------------------------------------------------------------------------|-------------------------------------------------|------------------------------------------|---------------------------------------------------|------------------------------------------|
| IMERG-Late | MAM    | T: >100% in most areas of humid; MC: H                                          | T: > 100% in most regions; MC: H and F   | The mutual cancellations between M and F                                             | T: >100% in most regions; MC: H                 | T: > 100% in most regions; MC: H and F   | T: >100% in most areas of semi-humid; MC: H and F | The mutual cancellations between M and F |
|            | JJA    | T: >100% in areas other than humid areas; MC: H                                 | T: >100% in northwest; MC: H             | Similar to MAM season, except for the magnitude of T and H is higher than MAM season | MC: H; the mutual cancellations between M and F | The mutual cancellations between M and F | T: between $\pm 20\%$                             | The mutual cancellations between M and F |
|            | SON    | T: between $\pm 60\%$ ; MC: H                                                   | The mutual cancellations between M and F | The mutual cancellations between M and F                                             | The mutual cancellations between M and F        | The mutual cancellations between M and F | T: between $\pm 40\%$                             | The mutual cancellations between M and F |
|            | DJF    | T: > 100% in humid areas and less than -60% in arid and semi-arid areas; MC: H, | T: >100% in south; MC: F and H           | the mutual cancellations between M and F                                             | T: >80% in most areas; MC: H                    | T: >100% in most areas; MC: H and F      | T: >-60% in most semihumid; MC: M                 | The mutual cancellations between M and F |

|              |     |                                                      |                                          |                                                                                      |                                                           |                                          |                                                    |                                          |
|--------------|-----|------------------------------------------------------|------------------------------------------|--------------------------------------------------------------------------------------|-----------------------------------------------------------|------------------------------------------|----------------------------------------------------|------------------------------------------|
|              |     | F and M, respectively                                |                                          |                                                                                      |                                                           |                                          |                                                    |                                          |
| GSMaP-MVK    | MAM | T: >100% in most areas of humid; MC: H               | T: > 100% in most regions; MC: H and F   | The mutual cancellations between M and F                                             | T: >80% in most regions; MC: H                            | T: >100% in most regions; MC: H and F    | T: > 100% in most areas of semi-humid; MC: H and F | The mutual cancellations between M and F |
|              | JJA | T: >100% in most areas; MC: H and F                  | T: > 100% in northwest; MC: H            | Similar to MAM season, except for the magnitude of T and H is higher than MAM season | MC: H; the mutual cancellations between M and F           | The mutual cancellations between M and F | T: between $\pm 20\%$                              | The mutual cancellations between M and F |
|              | SON | T: >60% in most areas; MC: H                         | The mutual cancellations between M and F | The mutual cancellations between M and F                                             | T: >60% in most areas; MC: H                              | The mutual cancellations between M and F | T: >100% in semihumid; MC: H and F                 | The mutual cancellations between M and F |
|              | DJF | T: > 80% in southeast; MC: H                         | T: > 100% in most areas; MC: H           | The mutual cancellations between M and F                                             | T: between -40% and -60% in most areas; MC: M             | The mutual cancellations between M and F | T: > 100% in the centre of mainland China; MC: F   | The mutual cancellations between M and F |
| PERSIANN-CCS | MAM | T: >100% in most areas other than humid; MC: F and H | T: >100%; MC: F                          | T: >80% in most regions; MC: H and F                                                 | T: <40% in most areas; the mutual cancellations between M | T: >100% in south; MC: H and F           | T: >-40% in most areas; MC: H                      | The mutual cancellations between M and F |

|     |                                                                                                     |                                          |                                           |                                          |                                          |                                                                         |                                          |  |
|-----|-----------------------------------------------------------------------------------------------------|------------------------------------------|-------------------------------------------|------------------------------------------|------------------------------------------|-------------------------------------------------------------------------|------------------------------------------|--|
|     |                                                                                                     |                                          |                                           |                                          | and F                                    |                                                                         |                                          |  |
| JJA | T: >100% in parts of midlands to west; MC: H and F                                                  | T: > 100% in northwest; MC: H and F      | T: >60% in most inland areas; MC: F       | The mutual cancellations between M and F | The mutual cancellations between M and F | The mutual cancellations between H and F                                | The mutual cancellations between M and F |  |
| SON | T: >100% in most areas of northeast and between -40 and -60 in southeast; MC: F and H, respectively | The mutual cancellations between M and F | T: >80% in most inland areas; MC: F and H | The mutual cancellations between M and F | The mutual cancellations between M and F | T: < -60% in humid; MC: M                                               | The mutual cancellations between M and F |  |
| DJF | T: >100% in areas other than humid; MC: F and H                                                     | T: >100%; MC: F                          | T: >80% in inland and east; MC: F and H   | T: >60% in most areas; MC: F             | T: > 80% in most areas; MC: F            | T: < -40% (>100%) in most areas of humid (other areas); MC: M (H and F) | The mutual cancellations between M and F |  |

<sup>a</sup> Noation: T, H, M, and F represents the total bias, hit bias, miss bias, and false bias, respectively; MC indicates the major component of total bias.
